# Supplementary material for: The Potential Use of Isothermal Amplification Assays for In-Field Diagnostics of Plant Pathogens
Source: MDPI journal article supplement (doi:10.3390/plants10112424), 2021-11-10
Supplement: s1 [file s1]

## *Supplementary Materials*

### **The Potential Use of Isothermal Amplification Assays for In-Field Diagnostics of Plant Pathogens**

Aleksandr V. Ivanov, Irina V. Safenkova, Anatoly V. Zherdev, Boris B. Dzantiev\*

A.N. Bach Institute of Biochemistry, Research Centre of Biotechnology of the Russian Academy of Sciences, Leninsky Prospect 33, 119071 Moscow, Russia; a.ivanov@fbras.ru (A.V.I.), safenkova@inbi.ras.ru, (I.V.S.), zherdev@inbi.ras.ru (A.V.Z.), dzantiev@inbi.ras.ru (B.B.D.)

\*Correspondence: dzantiev@inbi.ras.ru; Tel.: +74959543142

#### **CONTENT**

|                                                                                        |   |
|----------------------------------------------------------------------------------------|---|
| Section S1. Comparison of commercial kits for nucleic acid extraction and purification | 2 |
| Section S2. Description of Figure 5 diagrams.                                          | 4 |

Section S1. Comparison of commercial kits for nucleic acid extraction and purification.

**Table S1.** Comparison of commercial kits for nucleic acid extraction and purification (Listed alphabetically by kit name).

| Name                                                                  | Manufacturer                       | Extraction duration (min) | Homogenization / lysis type                                                           | Separation                | Capacity, µg per extraction | Thermal requirements                                                                              | Equipment                                                   |
|-----------------------------------------------------------------------|------------------------------------|---------------------------|---------------------------------------------------------------------------------------|---------------------------|-----------------------------|---------------------------------------------------------------------------------------------------|-------------------------------------------------------------|
| AmplifyRP® Acceler8™ for TCDVd*                                       | Adgia (USA)                        | <5                        | Mechanical (mesh)                                                                     | No                        | ND                          | Room temp.                                                                                        | No                                                          |
| DNAsecure Plant Kit                                                   | TianGen® (China)                   | 20                        | Grinding of frozen tissue/ND (no organic solvents, protease K added)                  | Column                    | 3–30                        | Liquid nitrogen for homogenization, then room temp.                                               | Centrifuge, vortex, grinder                                 |
| DNeasy Blood & Tissue Kits*                                           | Qiagen (Germany)                   | 20–60                     | Mechanical (bead mill)/ND (no organic solvents, protease K added)                     | Silica column             | 6–30                        | Room temp.                                                                                        | Centrifuge, vortex                                          |
| DNeasy Plant Pro and Plant Kits*                                      | Qiagen (Germany)                   | <60                       | Mechanical by tungsten carbide beads grinding/ND (no organic solvents)                | Silica column             | Up to 30                    | 65°C for lysis                                                                                    | TissueLyser, centrifuge, vortex, heat block                 |
| E.Z.N.A.® HP Fungal DNA Kit                                           | Omega Bio-tek (USA)                | Approx. 40                | Mechanical grinding of dried or frozen tissue/ND (use chloroform and isoamyl alcohol) | HiBind® DNA Mini Column   | 1–24                        | Liquid nitrogen/oven 45°C for homogenization, extraction: up to 65°C                              | Kontes pellet pestle, centrifuge, vortex, heat block        |
| FastDNA SPIN Kit for Soil*                                            | MP Biomedicals (USA)               | <30                       | Mechanical, sonication, enzymatic/ND                                                  | Spin column               | ND                          | Room temp.                                                                                        | FastPrep® instrument for homogenization, vortex, centrifuge |
| Fisher BioReagents™ SurePrep™ Plant/Fungi Total RNA Purification Kit* | Thermo Fisher Scientific (USA)     | 30                        | Mechanical/ND (no organic solvents)                                                   | Spin column               | 30–60                       | Room temp.                                                                                        | Centrifuge, mortar and pestle, vortex                       |
| Gene-Spin™ Genomic DNA Isolation Kit                                  | Protech Technology (Taiwan)        | 120–180                   | Mechanical grinding of frozen tissue/ND (no organic solvent, protease K added)        | Spin column               | ND                          | Liquid nitrogen for homogenization, extraction: up to 56°C                                        | Homogenizer/ mortar and pestle, heat block                  |
| innuPREP MP Basic Kit A*                                              | Analytik Jena (Germany)            | 20                        | Enzymatic (protease K)/ND (no organic solvents)                                       | Magnetic beads            | ND                          | Extraction: up to 50°                                                                             | Centrifuge, vortex, heat block                              |
| MagPure Fungal DNA TL Kit                                             | AngenBiotech (China)               | 60                        | ND/ND                                                                                 | Magnetic                  | ND                          | ND                                                                                                | ND                                                          |
| Monarch® Total RNA Miniprep Kit*                                      | NEB (USA)                          | Approx. 20                | Mechanical grinding/ND (no organic solvents)                                          | Spin column               | 100                         | Extraction: up to 55°                                                                             | Centrifuge, vortex, heat block, homogenizer                 |
| NucleoSpin Plant II, Mini kit for DNA from plants*                    | Macherey-Nagel (Germany)           | 30                        | Mechanical grinding/CTAB – SDS lysis (RNase A added)                                  | Silica column             | 1–30                        | Extraction: up to 65°                                                                             | Homogenizer/ mortar and pestle, heat block                  |
| PureLink™ Plant RNA Reagent                                           | Invitrogen (USA)                   | 60                        | Mechanical grinding of frozen tissue/salt extraction with 5M NaCl with chloroform     | Isopropanol precipitation | ND                          | Liquid nitrogen for homogenization, extraction: room temp. with 4°C cooling during centrifugation | Mortar and pestle, vortex, centrifuge with cooling          |
| RNAiso Plus (Total RNA extraction reagent)                            | Takara Bio Inc (Republic of Korea) | 60                        | Mechanical grinding of frozen tissue/ND (chloroform extraction)                       | Isopropanol precipitation | 1000                        | Liquid nitrogen for homogenization,                                                               | Mortar and pestle, vortex, centrifuge with cooling          |

|                                                        |                         |       |                                                                                    |                              |       |                                                                                                      |                                                                      |
|--------------------------------------------------------|-------------------------|-------|------------------------------------------------------------------------------------|------------------------------|-------|------------------------------------------------------------------------------------------------------|----------------------------------------------------------------------|
|                                                        |                         |       |                                                                                    |                              |       | Extraction: room temp.<br>with 4°C cooling during<br>centrifugation                                  |                                                                      |
| RNeasy Plant Mini Kit                                  | Qiagen (Germany)        | <20   | Mechanical grinding of frozen<br>tissue/ND (no organic solvents)                   | Spin column                  | 25–60 | Liquid nitrogen for<br>homogenization,<br>Extraction: room temp<br>with 4°C during<br>centrifugation | Mortar and pestle,<br>vortex, centrifuge                             |
| SureFood PREP Advanced Kit*                            | R-Biopharm<br>(Germany) | 80    | Thermal and enzymatic (protease<br>K added)/ND (no organic<br>solvents)            | Spin column                  | ND    | Lysis and<br>homogenization at 65°C,<br>then room temp.                                              | Heat block, centrifuge,<br>vortex                                    |
| Syntol Phytosorb*                                      | Syntol (Russia)         | 30    | Mechanical and thermal/ND (no<br>organic solvents)                                 | Magnetic beads               | ND    | Lysis 65°C, then room<br>temp.                                                                       | Heat block, vortex,<br>centrifuge, mortar and<br>pestle              |
| TRIzol™ Reagent                                        | Invitrogen (USA)        | 60    | Mechanical/phenol and<br>guanidine chloride extraction                             | Isopropanol<br>precipitation | ND    | Room temp., cooling 4°C                                                                              | Homogenizer,<br>centrifuge with<br>cooling, vortex                   |
| Wizard® Genomic DNA<br>Purification Kit                | Promega (USA)           | 90    | Mechanical grinding of frozen<br>tissue/ND (no organic solvents),<br>thermal lysis | Isopropanol<br>precipitation | 7–12  | Homogenization in liquid<br>nitrogen, Lysis at 65°C,<br>room temp.                                   | Homogenizer/ mortar<br>and pestle, heat block,<br>centrifuge, vortex |
| Wizard® Magnetic DNA<br>Purification System for Food*# | Promega (USA)           | 40–60 | ND/ND (no organic solvents)                                                        | Magnetic beads               | ND    | Drying at 65°C, then<br>room temp                                                                    | Heat block, centrifuge,<br>vortex                                    |

ND – no data.

\* - Kits that convenient for in-filed extraction

## Section S2. Description of Figure 5 diagrams.

We proposed the diagrams on Fig. 5 as our interpretation of the isothermal amplification based on analysis of publication. We set PCR as the standard for all described parameters. We evaluated the parameters based on many researches data. Most of the parameters were described in the manuscript. Some parameters are quite subjective, such as “easy in field.” Here we evaluated not only the number of published papers about in-field detection but our vision of the methods. For the parameter “high sensitivity,” we set value 1—the method at least 100-fold less sensitive than PCR, value 2—the method 10–100-fold less sensitive than PCR, or value 3—the method no more than 10-fold less sensitive or more sensitive than PCR. For “high specificity” value 1, the method cannot discriminate more than three mismatches, and for value 3, the method is able to discriminate no more single mismatches. Also, we made some speculations according to the temperature of primer annealing. The higher the temperature, the higher the specificity. We declare parameter “minimal equipment” 3 for all isothermal methods by the nature of assays. “Tolerance to inhibition” is quite speculative because few papers were published where clear results were presented. However, based on the possibility of RPA and LAMP proceed in crude extract, we concluded that they obtain high tolerance to plant inhibitors. Values for parameter “rapid” were set as 1—the method completed within 30 min, 2—the method completed within 30–60 min, or 3—the method completed in more than 60 min. The parameter “multiplexity” was estimated as the common possibility to have multiplexing and the number of papers describing the multiplexes.
